# Supplementary material for: S-acylation of P2K1 mediates extracellular ATP-induced immune signaling in Arabidopsis
Source: PubMed Central journal article supplement (PMC8115640; doi:10.1038/s41467-021-22854-1), 2021-05-12
Supplement: 41467_2021_22854_MOESM1_ESM.pdf [file 41467_2021_22854_MOESM1_ESM.pdf]

## Supplementary information

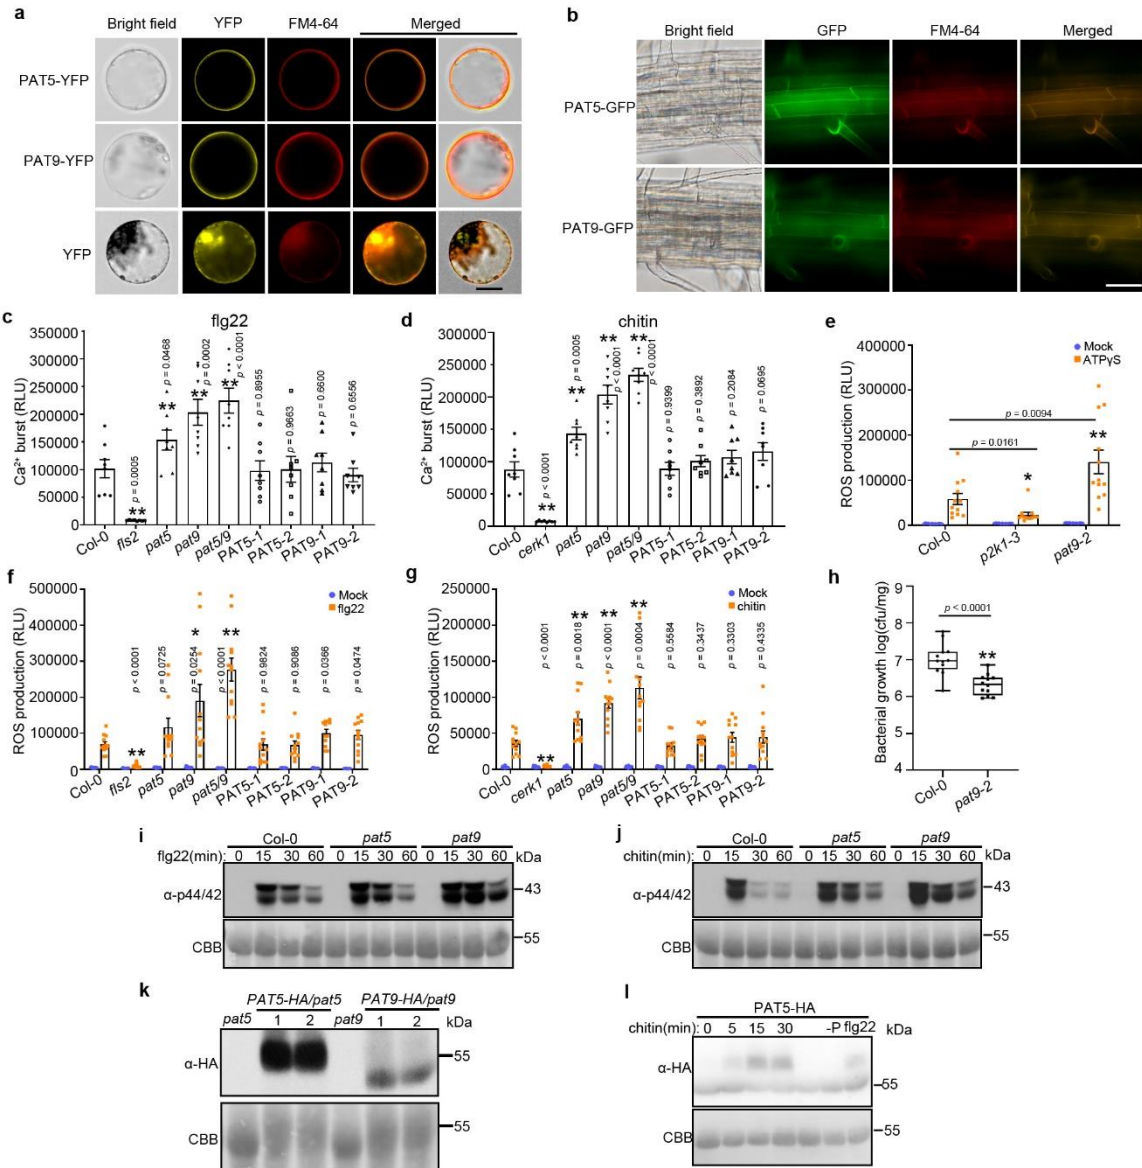

**Supplementary Fig. 1. Subcellular localization of PAT5 and PAT9 and PAMP-induced PTI immune response**

**a** PAT5-YFP and PAT9-YFP were transiently expressed in the *Arabidopsis* protoplasts, and merged well with the plasma membrane marker FM-64. Free YFP was used a control. Bar = 20  $\mu$ m. **b** PAT5-GFP and PAT9-GFP were localized at plasma membrane in the roots of *Arabidopsis* stable transgenic plants. Bar = 50  $\mu$ m. Experiments were repeated three times with similar results. **c-d** PAMPs-induced calcium influx. 5-day-old seedlings were treated with 1  $\mu$ M flg22 or 50  $\mu$ g/ml chitin for 30 min. RLU, relative luminescence units. Error bars indicate  $\pm$  SEM; n = 8 seedlings; \* $p$  < 0.05, \*\* $p$  < 0.01,  $P$ -values indicate significance

relative to Col-0 and were determined by one-sided ANOVA with multiple comparisons and adjusted using Benjamini–Hochberg post-test. **e-g** ROS production was measured in leaf discs after treatment with 1  $\mu$ M flg22 or 50  $\mu$ g/ml chitin for 30 min. Leaf discs were taken from WT (Col-0), *pat5*, *pat9* and *pat5/9* double mutants, or their complemented lines *PAT5* (*NP::ATPAT5-HA/Atpat5*) and *PAT9* (*NP::ATPAT5-HA/Atpat5*). Error bars indicate  $\pm$  SEM; n = 12 leaf discs; \**p* < 0.05, \*\**p* < 0.01, *P*-values indicate significance relative to Col-0 with ATP $\gamma$ S, flg22 or chitin treatment and were determined by one-sided ANOVA with multiple comparisons and adjusted using Benjamini–Hochberg post-test. **h** Bacterial invasion of *pat9-2* mutant. *Arabidopsis* seedlings were flood-inoculated with *Pst.* DC3000 bacteria and bacterial growth determined by plate counting 3 days post-inoculation (dpi). Error bars indicate  $\pm$  SEM; n = 12 (biological replicates); \*\**p* < 0.0001 (two tailed), significance between Col-0 and *pat9-2* was determined by one-sided ANOVA with unpaired, two-tailed Student's *t* test. Box extends from the 25th to the 75th percentile, whiskers denote minima and maxima (Boxplots, Col-0: max = 7.763; min = 6.161; center = 6.975; Q2 (25%) = 6.747; Q3 (75%) = 7.214, *pat9-2*: max = 6.857; min = 5.954; center = 6.331; Q2 (25%) = 6.039; Q3 (75%) = 6.515). **i-j** MAPKs activation of *Arabidopsis* leaf discs that treated with 1  $\mu$ M flg22 or 100  $\mu$ g/ml chitin. Experiments were repeated three times with similar results. **k** Relative expression protein levels of *NP::ATPAT5-HA/Atpat5* and *NP::ATPAT9-HA/Atpat9* complemented transgenic lines using their own native promoters. CBB was used as a loading control. **l** Ligand triggers PAT5 phosphorylation after treated with 1  $\mu$ M flg22 or 50  $\mu$ g/ml chitin. Coomassie Brilliant Blue (CBB) staining of protein was used as loading control. Experiments were repeated three times with similar results.

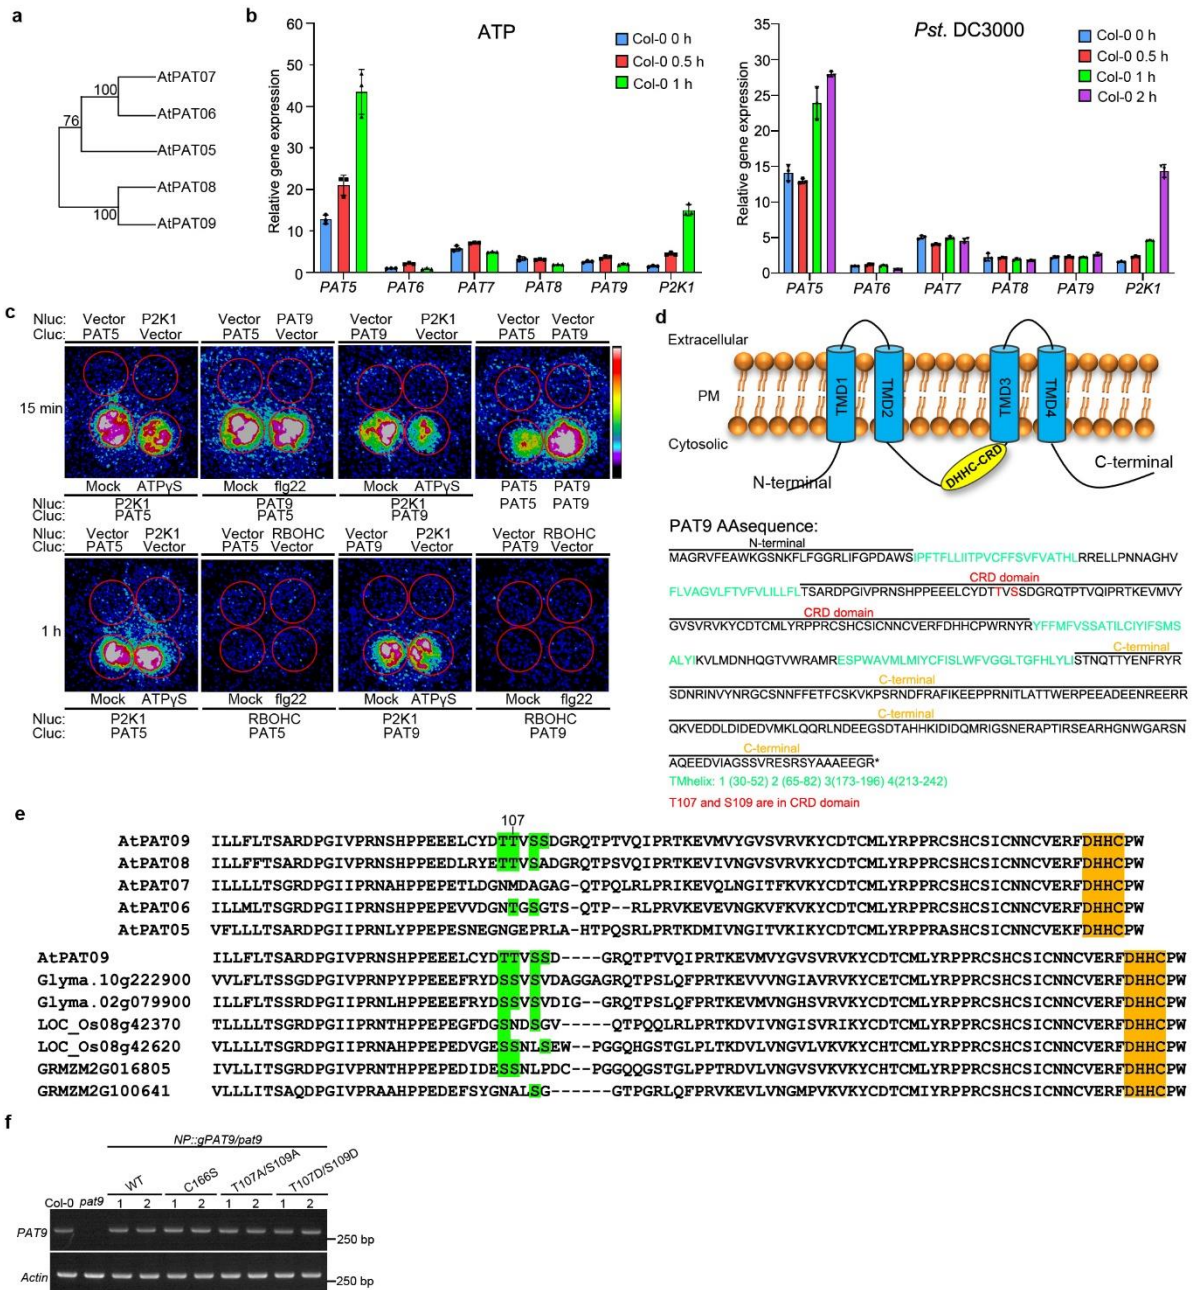

## Supplementary Fig. 2. PAT5 and PAT9 interact with P2K1

**a** A simple phylogenetic tree of PAT5, PAT6, PAT7, PAT8 and PAT9 obtained by a maximum likelihood (ML) approach using the PALM pipeline through their amino acid sequences. **b** ATP and pathogen induced *PAT5-PAT9* and *P2K1* gene expression in wild-type (Col-0) plants. RNA was extracted from 4-5 weeks old leaves which infiltrated with 200  $\mu$ M ATP and *Pst.* DC3000 (OD = 0.02). Error bars indicate  $\pm$  SD; n = 3, biological replicates. **c** PAT5 and PAT9 interact with P2K1 in *N. benthamiana* in an ATP-dependent manner. The indicated constructs were transiently expressed in *N. benthamiana* leaves with, where indicated in red circles, the

addition of 500  $\mu$ M ATP $\gamma$ S. Nluc, N-terminal fragment of firefly luciferase; Cluc, C-terminal fragment of firefly luciferase; Vector, empty vector. Red circles, where the *Agrobacteria* was infiltrated and interaction happened. The color bar represents the color code for fluorescence intensities. **d** Protein topology of PATs on plasma membrane. PM, plasma membrane. TMD, transmembrane domains. DHHC, Asp-His-His-Cys. CRD, a stretch of DHHC within a Cys-rich domain. The transmembrane domains and T107/S109 were showed in PAT9 protein sequence. **e** Alignment part of AtPAT9 orthologs and paralogs proteins. The claimed phosphosites of PAT9 and DHHC domain are conserved in *Arabidopsis* and different species. **f** Relative of *PAT9* gene expression level in different transgenic plants. *PAT9* gene expression was detected by RT-PCR, *Actin* gene expression was used as a control. Experiments were repeated three times with similar results.

P2K1 Topology

22-289 Extracellular domain TM 311-766 Cytoplasmic domain

| ID   | Position | Peptide                  | Score | Cutoff | Cluster                     |
|------|----------|--------------------------|-------|--------|-----------------------------|
| P2K1 | 87       | SFSTHFV <b>C</b> ALVPKPG | 0.447 | 0.0    | S-Palmitoylation: Cluster B |
| P2K1 | 296      | LILLPV <b>CL</b> AILVLA  | 0.502 | 0.0    | S-Palmitoylation: Cluster A |
| P2K1 | 394      | AEVSMR <b>CL</b> KHRNLV  | 2.301 | 1.991  | S-Palmitoylation: Cluster B |
| P2K1 | 407      | LVPLFGY <b>CR</b> RKRELL | 1.966 | 0.903  | S-Palmitoylation: Cluster C |
| P2K1 | 538      | VFMLEVT <b>CR</b> RRPVEP | 0.461 | 0.0    | S-Palmitoylation: Cluster C |
| P2K1 | 559      | RHMIKWV <b>CE</b> WKDSDS | 1.598 | 0.0    | S-Palmitoylation: Cluster B |
| P2K1 | 561      | MIKWV <b>CE</b> WKDSL    | 0.638 | 0.0    | S-Palmitoylation: Cluster C |
| P2K1 | 594      | VMKLGLL <b>CS</b> NIVPES | 0.355 | 0.0    | S-Palmitoylation: Cluster A |

### Supplementary Fig. 3. P2K1 protein domains and *S*-acylation sites prediction

Schematic representation of P2K1 protein structures contain an extracellular domain, a transmembrane domain (TM) and a cytoplasmic domain. The numbers in the topology and position indicate amino acids. The receptor protein sequences were analyzed by GPS-Lipid 1.0 software, the *S*-acylation residues were shown in red font.

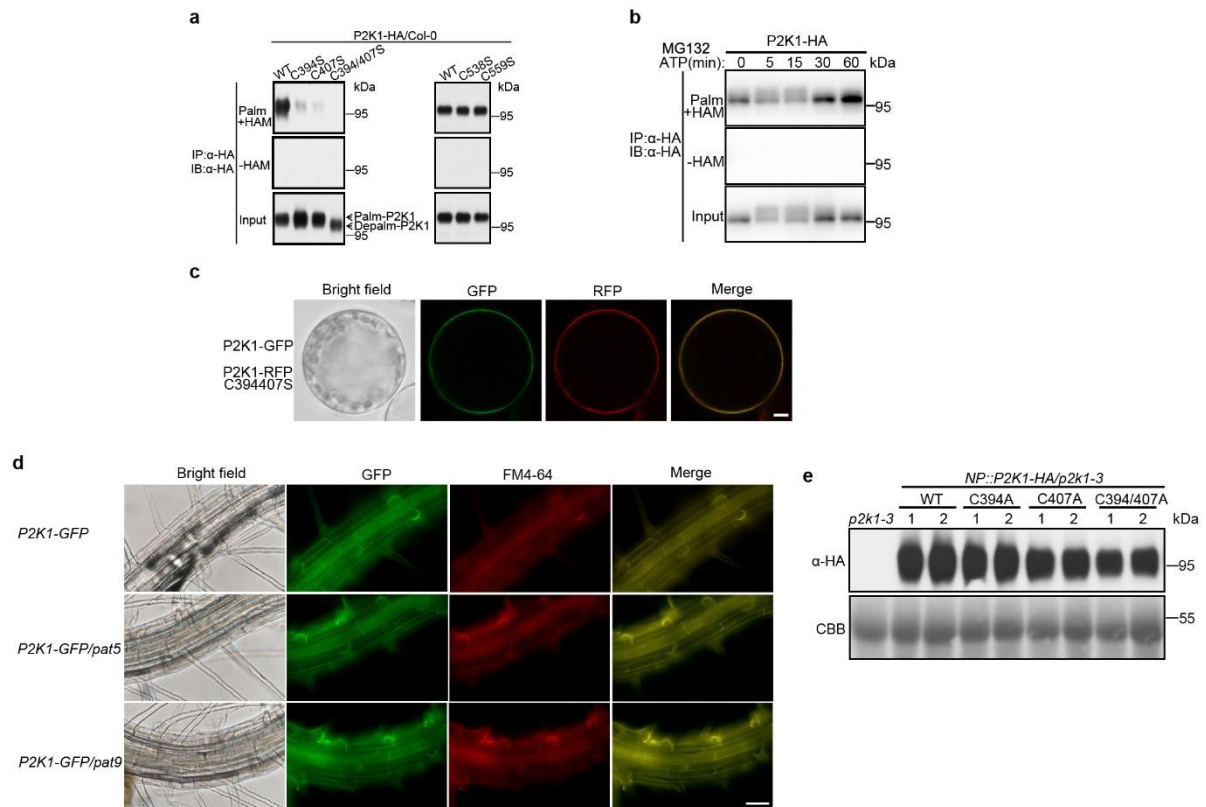

#### Supplementary Fig. 4. PAT5 and PAT9 regulate P2K1 S-acylation

**a** The P2K1 S-acylation residues were confirmed with C→S mutation in *planta*. The indicated constructs with HA tag were transiently expressed in *Arabidopsis* Col-0 protoplasts. The S-acylation levels were detected by an acyl-resin capture (acyl-RAC) assay. Palm-, palmitoylated protein; Depalm-, depalmitoylated protein. HAM, hydroxylamine, for cleavage of the Cys-palmitoyl thioester linkages. **b** Dynamic S-acylation levels of P2K1 in stable transgenic seedlings upon 200  $\mu$ M ATP and protein degradation inhibitor. MG132 was used to inhibit receptor degradation. **c, d** The palmitoylation state of P2K1 does not affect their trafficking to the PM in protoplasts or roots of stable P2K1-GFP transgenic plants. P2K1-GFP was transient co-expressed with P2K1<sup>C394/407S</sup>-RFP in *Arabidopsis* protoplasts. The 35S:P2K1-GFP plant was crossed with *pat5* and *pat9* mutant plants. Bar = 5  $\mu$ M in **c**; bar = 50  $\mu$ M in **d**. **e** Total P2K1-HA proteins were detected by anti-HA immunoblot for the stable transgenic plants. Full length of *P2K1* genomic DNA with about 1.5 kb native promoter was induced into *p2k1-3* mutant. CBB, Coomassie brilliant blue staining. All above experiments were repeated three times with similar results.

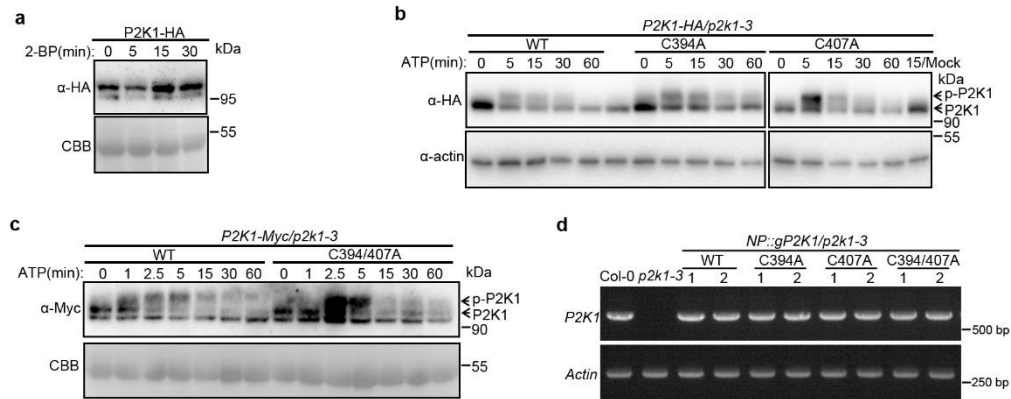

### Supplementary Fig. 5. PAT5 and PAT9 regulate P2K1 phosphorylation and degradation

**a** P2K1-HA protein accumulation was analyzed by immunoblot in wild type plant upon addition of 50  $\mu$ M 2-BP (*S*-acyltransferase inhibitor). **b** The ATP-induced P2K1 protein phosphorylation and protein degradation were detected in C394A and C407A mutated form. p-P2K1, phosphorylation of P2K1. **c** Another replicate of turnover and phosphorylation of P2K1 protein with modified (C $\rightarrow$ A) at the site of *S*-acylation. The indicated *Arabidopsis* plants were treated with 400  $\mu$ M ATP for indicated time. CBB was used as a loading control. **d** *P2K1* gene expression in the indicated stable transgenic plants without any tag using RT-PCR. NP: native promoter. All above experiments were repeated and analyzed three times with similar results.



**Supplementary Table 1. Sequence of primers used in this study**

| Primer                   | 5'-3'sequence                                                             | Purpose                       |
|--------------------------|---------------------------------------------------------------------------|-------------------------------|
| P2K1-B1                  | GGGGACAAGTTTGTACAAAAAAGCAGGCTTC ATGGCTCGTTGGTTGCTTCAGATC                  | For pDORN-Zeo                 |
| P2K1-B2                  | GGGGACCACTTTGTACAAGAAAGCTGGGTT CCTCTGACTGCTGATGCTGG                       |                               |
| P2K1 <sup>pro</sup> -B1  | GGGGACAAGTTTGTACAAAAAAGCAGGCTTC GAGAGGAGGTTCTTCCTGGTG <sub>g</sub>        |                               |
| P2K1 <sup>stop</sup> -B2 | GGGGACCACTTTGTACAAGAAAGCTGGGTT GAAACAATCCCAAGCCAT <sub>tget</sub>         |                               |
| PAT5-B1                  | GGGGACAAGTTTGTACAAAAAAGCAGGCTTC ATGTTAGATTTCAGCCGTCAG                     |                               |
| PAT5-B2                  | GGGGACCACTTTGTACAAGAAAGCTGGGTT TAACCGCCCTATACCAGTTCC                      |                               |
| PAT9-B1                  | GGGGACAAGTTTGTACAAAAAAGCAGGCTTC ATGGCTGGACGGGTCTTCGAA                     |                               |
| PAT9-B2                  | GGGGACCACTTTGTACAAGAAAGCTGGGTT CCGTCCCTCTCTGCAGCTGCATA                    |                               |
| PAT9-ProB1               | GGGGACAAGTTTGTACAAAAAAGCAGGCTTC<br>AAGATGAGGTTACAAGCGCAGACC               |                               |
| PAT9-B2 <sub>gem</sub>   | GGGGACCACTTTGTACAAGAAAGCTGGGTT AGGCAAAAACCAGAGTAACCT                      |                               |
| CD2b-B1                  | GGGGACAAGTTTGTACAAAAAAGCAGGCTTC ATGGCAGATAGTTTCGTCGAGGA                   |                               |
| CD2b-B2                  | GGGGACCACTTTGTACAAGAAAGCTGGGTT AACTTCTTCAGTAGCAACTTCAG                    |                               |
| RBOHC-B1                 | GGGGACAAGTTTGTACAAAAAAGCAGGCTTC ATGTCTAGAGTGAGTTTTGAAG                    |                               |
| RBOHC-B2                 | GGGGACCACTTTGTACAAGAAAGCTGGGTT GAAATCTCTTTGTGGAAGGAG                      |                               |
| P2K1-C394S-F             | GTCGTGAGCATGAGAT <sub>c</sub> TCTGAAACACAGGAATC                           | For site-directed mutagenesis |
| P2K1-C394S-R             | GATTCCTGTGTTTCAGAG <sub>g</sub> ATCTCATGCTCACGAC                          |                               |
| P2K1-C407S-F             | CCACTGTTTGGGTATT <sub>c</sub> CAGAAGAAAACGAGAAC                           |                               |
| P2K1-C407S-R             | GTTCTCGTTTTCTTCTG <sub>g</sub> AATACCCAAACAGTGG                           |                               |
| P2K1-C538S-F             | CATGCTTGAAGTAACCT <sub>c</sub> TGGGAGGAGACCCGTG                           |                               |
| P2K1-C538S-R             | CACGGGTCTCTCCCA <sub>g</sub> AGGTTACTTCAAGCATG                            |                               |
| P2K1-C559S-F             | CATATGATCAAATGGGTTT <sub>c</sub> TGAGTGCTGGAAAAAGGATTCTTTGC               |                               |
| P2K1-C559S-R             | GCAAAGAATCCTTTTTCCAGCACTCA <sub>g</sub> AAACCCATTTGATCATATG               |                               |
| P2K1-C394A-F             | GTCGTGAGCATGAGAG <sub>g</sub> cTCTGAAACACAGGAATC                          |                               |
| P2K1-C394A-R             | GATTCCTGTGTTTCAGAG <sub>g</sub> cTCTCATGCTCACGAC                          |                               |
| P2K1-C407A-F             | CCACTGTTTGGGTAT <sub>g</sub> cCAGAAGAAAACGAGAAC                           |                               |
| P2K1-C407A-R             | GTTCTCGTTTTCTTCTG <sub>g</sub> cATACCCAAACAGTGG                           |                               |
| PAT5-C188S-F             | GAAGTTTGATCACCACCT <sub>c</sub> TCCTTGGCTTGGTCAG                          |                               |
| PAT5-C188S-R             | CTGACCAAGCCAAGGA <sub>g</sub> AGTGGTGATCAAACCTTC                          |                               |
| PAT9-C166S-F             | GAGCGCTTTGATCATCAT <sub>t</sub> cCCCTTGAGAAACTATAG                        |                               |
| PAT9-C166S-R             | CTATAGTTTCTCCAAGGG <sub>g</sub> AATGATGATCAAAGCGCTC                       |                               |
| PAT9-T107A/S109A-F       | GAACTATGCTATGATACAG <sub>c</sub> CTGTAG <sub>c</sub> CAAGTGATGGAAGACAAACA |                               |
| PAT9-T107A/S109A -R      | TGTTTGTCTTCCATCACTT <sub>g</sub> cTACAG <sub>c</sub> TGTATCATAGCATAGTTC   |                               |
| PAT9-T107D/S109D-F       | GAACTATGCTATGATACAG <sub>a</sub> TGTAG <sub>g</sub> acAGTGATGGAAGACAAACA  |                               |
| PAT9-T107D/S109D -R      | TGTTTGTCTTCCATCACT <sub>g</sub> tTACA <sub>t</sub> cTGTATCATAGCATAGTTC    |                               |
| PAT5-CRD-F               | TCGC GGATCC ACCTCCGCGAGAGACCCAGGGAT                                       | For pET28a                    |
| PAT5-CRD-R               | GTCA CTCGAG CCTATAGTTTCTCAATCCAATGC                                       |                               |
| PAT5-C-F                 | TCGC GGATCC AGTACCAATCAGTCAACTTACG                                        |                               |
| PAT5-C-R                 | GTCA CTCGAG TAACCGCCCTATACCAGTCCG                                         |                               |
| PAT9-CRD-F               | TCGC GGATCC ACTTCTGCGCGGGATCTTGGGAATC                                     |                               |



|            |                                       |         |
|------------|---------------------------------------|---------|
| PAT9-CRD-R | GTC A CTCGAG CCTATAGTTTCTCCAAGGGCAATG |         |
| PAT9-C-F   | TCGC GGATCC AGCACAAACCAGACGACCTATGAG  |         |
| PAT9-C-R   | GTC A CTCGAG CCGTCCCTCTCTGCAGCTGCATAG |         |
| CD2b-F     | TCGC GAGCTC ATGGCAGATAGTTCGTCGAGGA    |         |
| CD2b-R     | GTC A CTCGAG AACTTCTTCAGTAGCAACTTCAG  |         |
| Actin2-F   | GCCATCCAAGCTGTTCTCTC                  | RT-PCR  |
| Actin2-R   | GCTCGTAGTCAACAGCAACAA                 |         |
| UBQ-QF     | TTCCTTGATGATGCTTGCTC                  | qRT-PCR |
| UBQ-QR     | TTGACAGCTCTTGGGTGAAG                  |         |
| P2K1-QF1   | TGTTAGACGCGGAGTTCCAT                  |         |
| P2K1-QR1   | TACCCTACAGTCCCAACAGC                  |         |
| PAT05-QF1  | GCTGTTGCTGTTGGTCTGAT                  |         |
| PAT05-QR1  | GCAACCGACTCTGAGGAGTA                  |         |
| PAT06-QF1  | TGTTGCTGTTGTCTTCACCA                  |         |
| PAT06-QR1  | GGCAATCTTGGAGTTTGGCT                  |         |
| PAT07-QF1  | GCCGTCGTGTTACCATTTA                   |         |
| PAT07-QR1  | GGTTTCAGGCTCTGGAGGAT                  |         |
| PAT08-QF1  | GATGCTAGGTCAGTGCCTCT                  |         |
| PAT08-QR1  | CCCGCATTGTAGGAGAGAA                   |         |
| PAT09-QF1  | CGCGAGCTCTTACCAAACAA                  |         |
| PAT09-QR1  | CTGGCGGATGCGAATTTCTT                  |         |
